8. Sauër AM, Nathoe HM, Hendrikse J, Peelen LM, Regieli J, Veldhuijzen DS, Kalkman CJ, Grobbee DE, Doevendans PA, van Dijk D; Octopus Study Group: Cognitive outcomes 7.5 years after angioplasty compared with off-pump coronary bypass surgery. *Ann Thorac Surg* 2013; 96:1294–300
9. Selnes OA: Invited commentary. *Ann Thorac Surg* 2013; 96:1300–1
10. Fink HA, Hemmy LS, MacDonald R, Carlyle MH, Olson CM, Dysken MW, McCarten JR, Kane RL, Garcia SA, Rutks IR, Ouellette J, Wilt TJ: Intermediate- and long-term cognitive outcomes after cardiovascular procedures in older adults: A systematic review. *Ann Intern Med* 2015; 163:107–17
11. Geschwind MD, Shu H, Haman A, Sejvar JJ, Miller BL: Rapidly progressive dementia. *Ann Neurol* 2008; 64:97–108
12. Inouye SK, Westendorp RG, Saczynski JS: Delirium in elderly people. *Lancet* 2014; 383:911–22
13. Krenk L, Rasmussen LS: Postoperative delirium and postoperative cognitive dysfunction in the elderly—What are the differences? *Minerva Anesthesiol* 2011; 77:742–9
14. Hassell ME, Nijveldt R, Roos YB, Majoie CB, Hamon M, Piek JJ, Delewi R: Silent cerebral infarcts associated with cardiac disease and procedures. *Nat Rev Cardiol* 2013; 10:696–706
15. Bedford PD: Adverse cerebral effects of anaesthesia on old people. *Lancet* 1955; 269:259–63

## ANESTHESIOLOGY REFLECTIONS FROM THE WOOD LIBRARY-MUSEUM

### Before the Lamaze Method: Bonwill “Rapid Breathing”

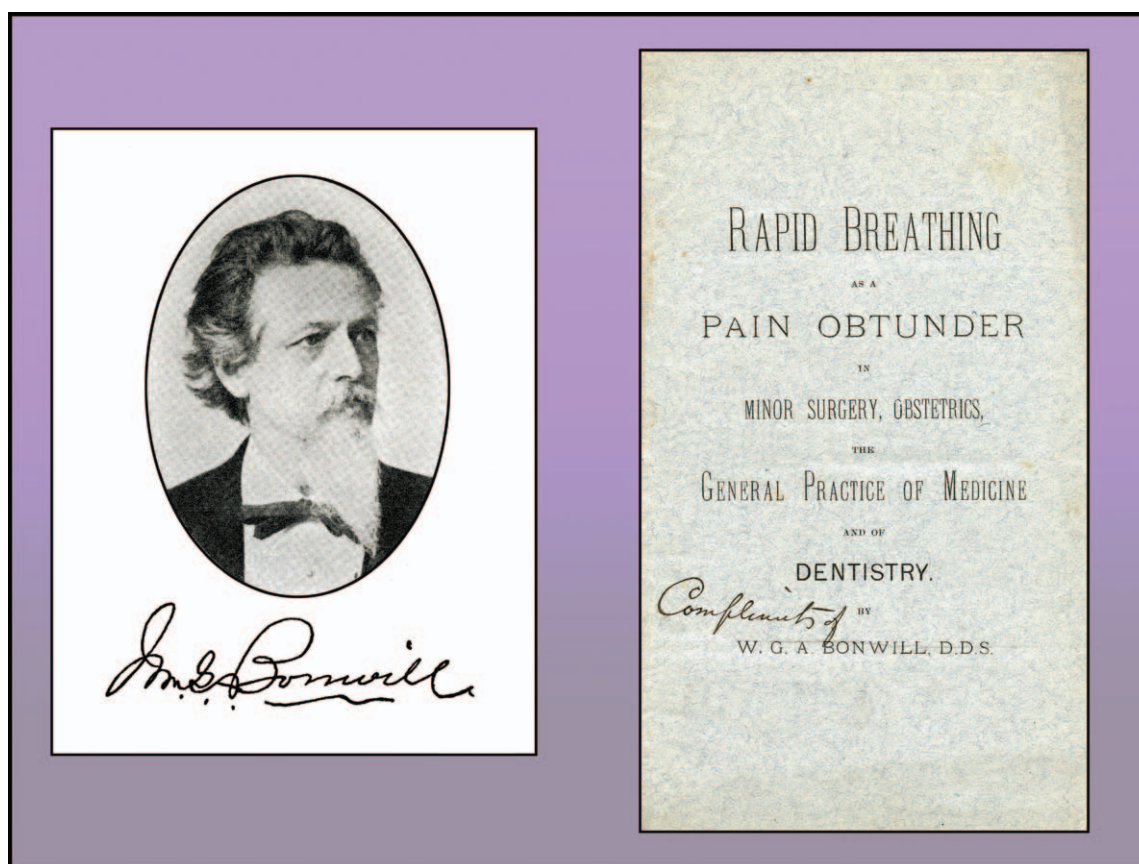

In 1875 a paper titled “The Air an Anaesthetic” was read at Philadelphia’s Franklin Institute. The author, William Gibson Arlington Bonwill, D.D.S., M.D. (1833 to 1899; *left*), had apprenticed in dentistry in New Jersey and Maryland before practicing dentistry in Delaware and then Pennsylvania. In 1880 Dr. Bonwill published (*right*) “Rapid Breathing as a Pain Obtunder in Minor Surgery, Obstetrics, the General Practice of Medicine and of Dentistry.” In 1894 Dr. Bonwill reported to other dentists and surgeons that “in an experience of twenty years [of dentistry] I have not used an anesthetic in my office.... My opinion is that if I could have introduced rapid breathing as a pain obtunder before nitrous oxide came out, you would all be using it.” Note that Dr. Bonwill demonstrated his “rapid breathing” techniques in Russia in 1897—54 years before Dr. Fernand Lamaze’s 1951 introduction in France of obstetrical breathing techniques that Lamaze had observed in Russia. (Copyright © the American Society of Anesthesiologists, Inc.)

George S. Bause, M.D., M.P.H., Honorary Curator, ASA’s Wood Library-Museum of Anesthesiology, Schaumburg, Illinois, and Clinical Associate Professor, Case Western Reserve University, Cleveland, Ohio. UJYC@aol.com.
